# Supplementary material for: Development and Validation of a Machine Learning-Based Risk Prediction Model for Low Back Pain in Middle-Aged and Elderly Chinese: A SHAP-Interpretable Longitudinal Cohort Study
Source: Research Square preprint supplement (doi:10.21203/rs.3.rs-6558522/v1), 2025-06-03
Supplement: Supplementary file 1 [file 541a4c71ccdefea54fad8f90.docx]

| Table S1 Basic characteristics of study participants in 2011. | | | |
| --- | --- | --- | --- |
| Variables | None-LBP  (n = 13857) | LBP  (n = 3300) | P -value |
| Age (mean (SD)) | 59.29 (9.92) | 59.85 (9.76) | 0.003 |
| Male (%) | 7088 (51.2) | 1266 (38.4) | <0.001 |
| Marital (%) |  |  | 0.013 |
| Married | 12118 (87.5) | 2823 (85.5) |  |
| Widowed/Divorced | 1614 (11.6) | 444 (13.5) |  |
| Never married | 125 (0.9) | 33 (1.0) |  |
| Education (%) |  |  | <0.001 |
| Illiterate | 8842 (63.9) | 2568 (77.9) |  |
| College | 4602 (33.3) | 706 (21.4) |  |
| College/Uni+ | 395 (2.9) | 22 (0.7) |  |
| BMI (mean (SD)) | 23.49 (3.90) | 23.27 (3.92) | 0.008 |
| Obesity (%) | 1204 (11.3) | 293 (10.9) | 0.535 |
| Waist (mean (SD)) | 85.33 (10.50) | 84.72 (10.32) | 0.007 |
| Location (%) | 12217 (88.2) | 3089 (93.6) | <0.001 |
| Insurance (%) | 12946 (93.4) | 3070 (93.0) | 0.435 |
| Self-perceived health status (%) |  |  | <0.001 |
| Poor | 3243 (23.4) | 1849 ( 56.0) |  |
| Fair | 6751 (48.7) | 1222 ( 37.0) |  |
| Good | 3856 ( 27.8) | 229 (6.9) |  |
| Physical disabilities (%) | 511 (3.7) | 219 (6.6) | <0.001 |
| Brain damage (%) | 353 (2.5) | 156 (4.7) | <0.001 |
| Vision problem (%) | 4301 (31.0) | 1735 (52.6) | <0.001 |
| Hearing disabilities (%) | 1098 (7.9) | 442 (13.4) | <0.001 |
| Hypertension (%) | 3296 (23.8) | 934 (28.3) | <0.001 |
| Dyslipidemia (%) | 1230 (9.0) | 347 (10.8) | 0.002 |
| Disabates (%) | 748 (5.4) | 239 (7.3) | <0.001 |
| Cancer (%) | 127 (0.9) | 47 (1.4) | 0.012 |
| Chronic lung diseases (%) | 1194 (8.6) | 565 (17.1) | <0.001 |
| Heart attack (%) | 1457 (10.5) | 609 (18.5) | <0.001 |
| Stroke (%) | 295 (2.1) | 112 (3.4) | <0.001 |
| Chronic kidney diseases (%) | 622 (4.5) | 467 (14.3) | <0.001 |
| Digestive diseases (%) | 2542 (18.4) | 1266 (38.5) | <0.001 |
| Emotional diseases (%) | 158 (1.1) | 85 (2.6) | <0.001 |
| Memory-related diseases (%) | 181 (1.3) | 93 (2.8) | <0.001 |
| Arthritis or rheumatism (%) | 3767 (27.3) | 1917 ( 58.3) | <0.001 |
| Asthma (%) | 409 (3.0) | 220 (6.7) | <0.001 |
| Hip fracture (%) | 164 (1.3) | 97 (3.1) | <0.001 |
| Drinking (%) | 1127 (11.0) | 230 (8.9) | 0.002 |
| Smoking (%) |  |  | <0.001 |
| None | 8153 (61.3) | 2118 (65.9) |  |
| Smoker | 3980 (29.9) | 851 (26.5) |  |
| Ex-smokers | 1164 (8.8) | 246 (7.7) |  |
| Sleep duration (mean (SD)) | 6.50 (1.81) | 5.78 (2.12) | <0.001 |
| Daytime nap (mean (SD)) | 32.63 (42.75) | 31.22 (42.22) | 0.098 |
| Sleep quality (%) |  |  | <0.001 |
| Good | 6721 (53.5) | 903 (29.3) |  |
| Fair | 3800 (30.2) | 1160 (37.7) |  |
| Poor | 2052 (16.3) | 1017 (33.0) |  |
| Social activities (%) | 7606 (54.9) | 1614 (48.9) | <0.001 |
| CESD (mean (SD)) | 7.36 (5.80) | 12.79 (6.68) | <0.001 |
| Depression (%) | 3647 (30.3) | 1888 (65.2) | <0.001 |
| Life satisfaction (%) |  |  | <0.001 |
| Poor | 1520 (11.0) | 697 (21.1) |  |
| Fair | 9709 (70.1) | 2132 (64.6) |  |
| Good | 2628 (19.0) | 471 (14.3) |  |
| Grip strength (mean (SD)) | 31.77 (10.45) | 28.47 (10.15) | <0.001 |
| Jogging (%) |  |  | <0.001 |
| Poor | 4648 ( 34.2) | 1942 (59.6) |  |
| Fair | 1772 ( 13.0) | 439 (13.5) |  |
| Good | 7169 ( 52.8) | 875 (26.9) |  |
| PEFR (mean (SD)) | 266.61 (116.88) | 241.17 (110.39) | <0.001 |
| Walking speed (mean (SD)) | 4.95 (10.87) | 5.41 (14.47) | 0.224 |
